# Supplementary material for: Larval competition between the invasive Anopheles stephensi and African native mosquitoes
Source: Research Square preprint supplement (doi:10.21203/rs.3.rs-9807896/v1), 2026-06-05
Supplement: Supplementary file 1 [file f319391e016ee0c50c716dc1.docx]

Supplement

Figure S1. Adult wing size at different larval food supplies and larval densities for females (top panel) and males (bottom panel). Within the same figure, wing size connected with different letters at different densities indicated significantly different at level of 0.05 (ANOVA post hoc Tukey-Kramer test).

Table S1. Comparison of wing sizes between low and high food at different larval densities for both females and males.

Table S2. Generalized liner model analysis of larval density and food supply on adult emergence rate.

Table S3. Generalized liner model analysis of larval density and food supply on adult emergence times. A) Female emergence time; B) Male emergence time.
